# Supplementary material for: Genome-wide association study reveals sex-specific genetic architecture of facial attractiveness
Source: PLoS Genet. 2019 Apr 4;15(4):e1007973. doi: 10.1371/journal.pgen.1007973 (PMC6448826; doi:10.1371/journal.pgen.1007973)
Supplement: S2 Table — (XLSX) [file pgen.1007973.s019.xlsx]

## Sheet: S2 Table
Trait	Locus	SNPa	Nearby Genes	Pos (hg19)	Allelesb	Beta	SE	EAFc	P-valued
MC-AS	2q22.1	rs74645087	LRP1B	141387481	C/A	0.644	0.123	0.016	1.66e-07
	20q13.11	rs117355564	PTPRT	41709654	A/G	-0.612	0.122	0.016	5.39e-07
FC-AS	6p25.1	rs58886198	LY86	6612665	C/T	-0.193	0.039	0.167	9.93e-07
MC-FS	11p15.2	rs4756781	SPON1	14254570	G/T	-0.269	0.052	0.209	3.04e-07
FC-FS	8q24.11	rs17746363	MED30, EXT1	118611634	C/T	-0.26	0.051	0.205	4.3e-07
	17p13.3	rs4968067	NXN	853406	C/A	0.221	0.044	0.331	6.12e-07
MC-MS	17q11.2	rs2074151	RAB11FIP4	29856942	G/A	0.261	0.05	0.239	2.22e-07
FC-MS	1q21.3	rs6587551	CERS2, ANXA9	150952674	A/T	-0.219	0.044	0.458	6.23e-07
	5p15.31	rs4358496	LOC285692	9748607	G/A	-0.255	0.051	0.252	5.21e-07
	12q12	rs4768005	PDZRN4, GXYLT1	42125587	A/G	0.386	0.077	0.086	5.89e-07
a The most significant SNP at each locus is listed; b Reference/effect allele; c Effect allele frequency; d Genome-wide significant associations are highlighted in boldface.
