# Supplementary material for: Genome-wide association study reveals sex-specific genetic architecture of facial attractiveness
Source: PLoS Genet. 2019 Apr 4;15(4):e1007973. doi: 10.1371/journal.pgen.1007973 (PMC6448826; doi:10.1371/journal.pgen.1007973)
Supplement: S6 Table — Top five tissues with the highest z-scores were listed for each tissue. MC-MS was not included in the table because no tissue had positive z-scores in our analysis. (XLSX) [file pgen.1007973.s023.xlsx]

## Sheet: S6 Table
Trait	Tissue	Enrichment	z-score	p-value
FC-AS	Testis	3.92712	1.75501	0.0396
	Ovary	3.93973	1.73385	0.0415
	Adrenal Gland	2.59904	0.97506	0.1648
	Esophagus Mucosa	2.50681	0.867588	0.1928
	Spleen	2.60897	0.858969	0.1952
MC-AS	Ovary	4.47806	1.8487	0.0323
	Uterus	3.72881	1.46492	0.0715												blue are tissues sex-specific or release sexual hermone (Adrenal). Green are tissues related to digestion or metabilism, indirectly connect to fitness.
	Brain Cerebellum	3.35691	1.28791	0.0989
	Nerve Tibial	3.2677	1.16854	0.1213
	Adrenal Gland	2.8358	1.01869	0.1542
FC-FS	Ovary	2.97917	2.59466	0.0047
	Esophagus Muscularis	2.56161	2.48674	0.0064
	Adrenal Gland	2.57962	2.45779	0.007
	Breast Mammary Tissue	2.51241	2.24168	0.0125
	Spleen	2.43981	2.14258	0.0161
MC-FS	Ovary	5.73247	1.77907	0.0376
	Pancreas	3.72451	1.343	0.0896
	Uterus	4.06435	1.32516	0.0926
	Heart - Left Ventricle	4.19242	1.21944	0.1113
	Spleen	3.11013	1.14618	0.1259
FC-MS	Whole Blood	16.321	0.868	0.1927
	Small Intestine Terminal Ileum	9.07	0.57	0.2843
	Spleen	9.836	0.558	0.2884
	Cells EBV Transformed Lymphocytes	9.42	0.5	0.3085
	Brain Hypothalamus	4.629	0.489	0.3123
